# Supplementary material for: Multiclinic Observations on the Simplified Diet in PKU
Source: Hindawi journal article supplement (doi:10.1155/2017/4083293), 2017-01-01
Supplement: f1 [file 4083293.f1.pdf]

Image 1. Simplified PKU Diet; Department of Nutrition, Boston Children’s Hospital

## Simplified PKU Diet

|                                                                                                                                                                                                                                                                                                      |                                                                                                                                                                                                                                                           |
|------------------------------------------------------------------------------------------------------------------------------------------------------------------------------------------------------------------------------------------------------------------------------------------------------|-----------------------------------------------------------------------------------------------------------------------------------------------------------------------------------------------------------------------------------------------------------|
| <p style="text-align: center;"><b>Medical Food (Formula)</b></p> <ul style="list-style-type: none"> <li>• Medical food provides protein that is phenylalanine-free or low in phenylalanine.</li> <li>• Medical food takes the place of high protein foods such as meat and dairy products</li> </ul> | <p style="text-align: center;"><b>Food</b></p> <ul style="list-style-type: none"> <li>• The diet includes foods that are low in protein/phenylalanine.</li> <li>• Count intake using the guidelines below.</li> <li>• Recommended intake _____</li> </ul> |
|------------------------------------------------------------------------------------------------------------------------------------------------------------------------------------------------------------------------------------------------------------------------------------------------------|-----------------------------------------------------------------------------------------------------------------------------------------------------------------------------------------------------------------------------------------------------------|

  

### Low Protein Foods - No Limit

|                                                                                                                                                                                                                                                                                                                                                                                                                                                                                                                                                                                                                                                   |                                                                                                                                                                                                                                                                                                                                                                                                                                                                                                                                                                                                                                                                                                                                                                                                                                                                                                                                                                                                                                                                                                                                                                                                                                                                                                                                                                                                                                                                                                                                                                                                                                                                                                                                                        |                                                                                                                                                                                                                                                                                                                                                                                                                                                                                                                                                                                                                                                                  |
|---------------------------------------------------------------------------------------------------------------------------------------------------------------------------------------------------------------------------------------------------------------------------------------------------------------------------------------------------------------------------------------------------------------------------------------------------------------------------------------------------------------------------------------------------------------------------------------------------------------------------------------------------|--------------------------------------------------------------------------------------------------------------------------------------------------------------------------------------------------------------------------------------------------------------------------------------------------------------------------------------------------------------------------------------------------------------------------------------------------------------------------------------------------------------------------------------------------------------------------------------------------------------------------------------------------------------------------------------------------------------------------------------------------------------------------------------------------------------------------------------------------------------------------------------------------------------------------------------------------------------------------------------------------------------------------------------------------------------------------------------------------------------------------------------------------------------------------------------------------------------------------------------------------------------------------------------------------------------------------------------------------------------------------------------------------------------------------------------------------------------------------------------------------------------------------------------------------------------------------------------------------------------------------------------------------------------------------------------------------------------------------------------------------------|------------------------------------------------------------------------------------------------------------------------------------------------------------------------------------------------------------------------------------------------------------------------------------------------------------------------------------------------------------------------------------------------------------------------------------------------------------------------------------------------------------------------------------------------------------------------------------------------------------------------------------------------------------------|
| <br><br><br><br><br><br><br><br><br><br><br><br> | <p style="margin: 0;"><b>Fruits</b></p> <ul style="list-style-type: none"> <li>• All fruits that are fresh, frozen, or canned.<br/>Examples: apple, orange, pear, peach, melon, banana, pineapple, nectarine, berries, plum, kiwi, mango, grapefruit, clementine, fruit cocktail, applesauce, grapes</li> <li>• Dried cranberries, raisins, prunes, and apples.</li> </ul> <hr/> <p style="margin: 0;"><b>Vegetables</b></p> <ul style="list-style-type: none"> <li>• Most are low in protein – no limit<br/>Examples: asparagus, brussels sprouts, carrot, celery, cucumber, lettuce, onion, beet, cabbage, green pepper, red pepper, zucchini, cauliflower, squash, mushrooms, green beans, wax beans, artichokes, eggplant, tomato, plantain, raw spinach, raw arugula, and raw kale</li> </ul> <hr/> <p style="margin: 0;"><b>Specialty Low Protein Foods</b></p> <ul style="list-style-type: none"> <li>• Most are low in protein*<br/>Examples: low protein pasta, rice, bread, bagel, cereal, broth, cookies, peanut butter substitute</li> </ul> <p style="margin: 0;">*Discuss with dietitian about where to order, which to count</p> <hr/> <p style="margin: 0;"><b>Other Foods</b></p> <ul style="list-style-type: none"> <li>• Contain sugar and fat, but no protein, add extra calories</li> <li>• Examples:             <ul style="list-style-type: none"> <li>• Soft drinks such as lemonade, soda, iced tea (avoid aspartame)</li> <li>• Fats – butter, margarine, vegetable oil, mayonnaise, salad dressings (if label indicates zero protein)</li> <li>• Other – nondairy creamer, coconut milk yogurt and ice cream; jelly, jam, sugar, maple syrup, popsicle, Italian ice, sorbet, marshmallow, hard candy</li> </ul> </li> </ul> | <br><br><br><br><br><br><br><br><br><br><br><br> |
|---------------------------------------------------------------------------------------------------------------------------------------------------------------------------------------------------------------------------------------------------------------------------------------------------------------------------------------------------------------------------------------------------------------------------------------------------------------------------------------------------------------------------------------------------------------------------------------------------------------------------------------------------|--------------------------------------------------------------------------------------------------------------------------------------------------------------------------------------------------------------------------------------------------------------------------------------------------------------------------------------------------------------------------------------------------------------------------------------------------------------------------------------------------------------------------------------------------------------------------------------------------------------------------------------------------------------------------------------------------------------------------------------------------------------------------------------------------------------------------------------------------------------------------------------------------------------------------------------------------------------------------------------------------------------------------------------------------------------------------------------------------------------------------------------------------------------------------------------------------------------------------------------------------------------------------------------------------------------------------------------------------------------------------------------------------------------------------------------------------------------------------------------------------------------------------------------------------------------------------------------------------------------------------------------------------------------------------------------------------------------------------------------------------------|------------------------------------------------------------------------------------------------------------------------------------------------------------------------------------------------------------------------------------------------------------------------------------------------------------------------------------------------------------------------------------------------------------------------------------------------------------------------------------------------------------------------------------------------------------------------------------------------------------------------------------------------------------------|

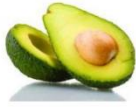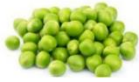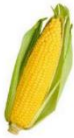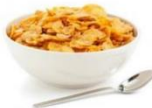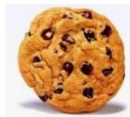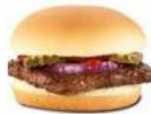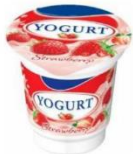

### **Medium Protein Foods – Need to Count**

**These vegetables/fruits are higher in protein and must be counted**

- |                   |                     |
|-------------------|---------------------|
| Artichokes        | Potatoes            |
| Arugula (cooked)  | Portabella Mushroom |
| Avocado           | Seaweed             |
| Broccoli          | Sundried tomatoes   |
| Collards (cooked) | Sweet Potatoes      |
| Corn              | Swiss Chard         |
| Kale (cooked)     | Yam                 |
| Peas              |                     |

Dried fruits (e.g. dried apricots, bananas, dried cherries)

### **Bread and Cereal Products**

- Read food labels- look for the lowest in protein
- Examples:
  - Breakfast foods: toast, bagel, English muffin, waffle, pancake, cereal, small muffin, donut
  - Lunch and dinner foods: bread, pita, roll, tortilla, rice, pasta
  - Snack foods: potato chips, corn chips, rice cakes, Goldfish, crackers, popcorn, cookies

### **High Protein Foods (Avoid)**

- These foods are high in protein
  - Meat (All types- beef, lamb, pork, chicken, turkey, fish, etc.)
  - Eggs
  - Dairy products (cheese, yogurt, ice cream)
  - Nuts and seeds (including nut/seed butters)
  - Soy protein (tofu tempeh, many vegetarian burgers)
  - Legumes (kidney beans, garbanzos, lentils, split peas, hummus)

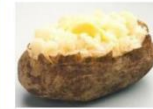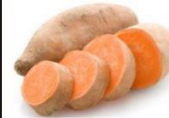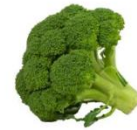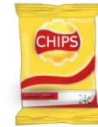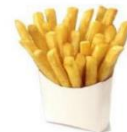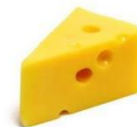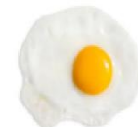

### **Boston Children's Hospital Metabolism Program**

Fran Rohr, MS RD  
Ann Wessel, MS, RD  
Leslie Martell, MS, RD

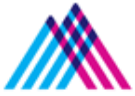

## Explanation of Low Protein Diet

The low protein diet is divided into 4 categories:

1. Foods not allowed (completely eliminated from diet)
2. Foods allowed in limited quantities, called "limited items"
3. Foods allowed in unlimited quantities (as much as desired)
4. Special formula

### 1. Foods not allowed

- All Meat and meat products (includes gelatin and bouillon)
- Fish, fish products, and all types of seafood.
- Milk in any form, dairy products and all derivatives (such as eggs, cream, cheese, ice cream, sherbet, yogurt, etc.)
- Legumes such as soybeans, lentils, split peas, lima beans, green peas, any peas or beans (except green beans or wax beans), or any isolated protein derived from these sources such as vegetable protein, soy protein, soy flour, soy sauce, soybean curd (tofu), etc.
- Nuts and nut butters (including coconut and chestnuts)
- Seeds (all including sesame seed paste (Tahini).
- Any commercial product or condiments containing protein unless approved by the nutritionist.

### 2. Foods allowed in limited quantities

- Corn (including popcorn and corn chips)
- Potatoes (including French fries, potato chips, and yams)
- Rice and rice products
- Breads and baked goods
- Commercial breakfast cereals containing less than 2 grams of protein per cup
- Oranges, orange juice, bananas and plantains

The amount of all limited items and foods containing protein must be strictly controlled. Patients may be allowed 1 to 3 limited items or 0-10 grams of protein daily depending on doctor's or nutritionists orders. If blood levels cannot be maintained within a satisfactory range the number of limited items is reduced. Portions of all limited items and any food containing protein must be measured. For the correct portion sizes see Portion Sizes for Limited Items

### 3. Foods allowed in unlimited quantities

- All vegetables except the ones listed as limited or marked with an asterisk. See **Allowed Vegetables**
- All fruits except the ones listed as limited. See **Allowed Fruits**
- Special low protein products such as wheat starch bread, wheat starch, low protein baking mix, and all products made from these items. Sold as low protein foods from specialty companies.
- All condiments and foods which are free of any food or derivatives of foods which are un-allowed or limited. **See Allowed Condiments** and **Unlimited Foods**
- All beverages which are free of any food or derivatives of foods which are un-allowed or limited. **See Allowed Beverages**

### 4. Special Formula or Amino Acid Supplement

The special products are prescribed by the metabolic nutritionist to supply adequate protein, calories, vitamins, and minerals for normal growth and development.

## ALLOWED FRUITS

|                          |                            |
|--------------------------|----------------------------|
| acerola                  | nectarines                 |
| apples                   | <b>oranges (limited)</b>   |
| apricots                 | passion fruit              |
| <b>bananas (limited)</b> | paw paw                    |
| blackberries             | papayas                    |
| cherries                 | peaches                    |
| cranberries              | pears                      |
| currants                 | persimmons                 |
| dates                    | pineapple                  |
| figs                     | <b>plantains (limited)</b> |
| grapes (all varieties)   | plums (all varieties)      |
| grapefruit               | pomegranate                |
| guava                    | prunes                     |
| kiwi fruit               | quinces "emu apple"        |
| kumquat                  | raisins                    |
| lemons                   | raspberries                |
| limes                    | rhubarb                    |
| lychees                  | strawberries               |
| loquat                   | sapodillo                  |
| mangos                   | tangeloes                  |
| melons (all varieties)   | tangerines                 |
|                          | watermelon                 |

NOTE: Limited fruits must be counted as limited items when large portions are eaten (see Portion Sizes for Limited Items), These fruits do not have to be counted as limited items, however, when used in small quantities such as in cooking (ex: banana bread), in fruit salad, etc.

# ALLOWED VEGETABLES

Vegetables marked with an \* when eaten in large quantities, add a significant amount of protein to the day's intake. Do not eat more than one vegetable marked with an asterisk per meal, and ½ cup max. They may be used freely in small quantities such as vegetable stews and mixed dishes. The number in parentheses is for protein content in ½ cup, **cooked** except for parsley.

acorn squash  
anise  
\*artichoke (2.43 g)  
asparagus  
\*bamboo shoots (0.92 g)  
basella (Indian spinach)  
beets  
beet greens  
\*broccoli (1.86 g)  
broccoli rabe  
\*brussel sprouts (1.99 g)  
burdock  
butternut squash  
cabbage  
carrots  
\*cassava = yuca, manioc (1.5g)  
\*cauliflower (1.14 g)  
celery  
celeriac (celery roots)  
chard  
chayote squash  
chicory  
Chinese cabbage (Bok choy)  
chives  
\*collard greens (1.2 g)  
coriander (chinese parsley)  
**corn (limited)**  
cucumber  
dandelion greens  
dasheen (Japanese taro)  
eggplant (aubergine)  
endive  
escarole  
\*fennel (finocchio, 0.54g)  
garlic  
ginger root  
green beans (string beans)  
hearts of palm

hubbard squash  
horseradish root  
\*kale (1.24 g)  
kohlrabi  
leek  
lettuce (all varieties)  
\*lotus root (0.95 g)  
\*mushrooms (1.13gm, cooked)  
mustard greens  
okra  
olives  
onions  
\*parsley (0.89 g)  
parsnips  
peppers (red and green)  
**potatoes (limited)**  
pumpkin  
purslane  
radishes  
rutabaga  
sauerkraut  
\*salsify (oyster plant, 1.84 g)  
scallions  
shallots  
spinach, raw  
spinach, cooked (2.6g)  
squash (all varieties)  
sorrel (dock, sourgrass)  
**sweet potato, yams (limited)**  
tampala leaves  
tomatoes  
turnips  
\*turnip greens (0.82 g)  
watercress  
water chestnuts  
wax beans  
**yautia (mélange, limited)**  
zucchini

# ESTIMATED PORTION SIZES FOR LIMITED ITEMS

## Containing 2 grams of protein

- 1 serving potato = 1 small potato (2 inch diameter)  
1/2 large potato (4-3/4 inch X 2-1/2 inch)  
1/2 cup mashed potatoes (no milk)  
20 potato chips (2 inch diameter) or a 1 - ounce bag  
10 thick French fries (1/2 X 1/2 X 2 inch)  
20 very thin French fries (McDonald's type – small order)  
note: medium = 4 grams and large = 6 grams
- 1 serving corn = 1 small ear of corn on cob (3" long)  
1/2 cup corn  
1 1-ounce package Fritos corn chips  
1-1/2 tablespoon un popped popcorn (110 kernels = 25.5 g)  
1- 1/2 corn tortilla (6 inch diameter)
- 1 serving rice = 1/2 cup cooked brown or white rice
- 1 serving cereal = 1 cup allowed ready-to-eat breakfast cereal  
1 cup cooked rice cereal
- 1 serving orange = 1- 1/2 medium orange \*  
10 ounces orange juice  
1 cup orange segments
- 1 serving banana = 2 small bananas (7-3/4 inch X 1-1/4 inch)  
3/4 cup mashed banana  
1-1/4 large banana (9-3/4 inch X 1-1/2 inch)

\*NOTE: Florida oranges contain less protein than California oranges, therefore serving sizes are based on Florida oranges.

These are **estimates**, please **read the food labels on packaging**.

## ALLOWED CONDIMENTS/SAUCES

|                                                                                                                   |                                    |
|-------------------------------------------------------------------------------------------------------------------|------------------------------------|
| Jelly/Jam                                                                                                         | Tapioca                            |
| Syrup (all types)                                                                                                 | Arrowroot                          |
| Catsup (any brand)                                                                                                | Baking powder                      |
| Mustard (any brand)                                                                                               | Baking Soda                        |
| A-1 Steak Sauce                                                                                                   | Herbs and spices                   |
| Horseradish                                                                                                       | Tomato sauce, tomato paste         |
| Imitation butter flavoring                                                                                        | Relish                             |
| Flavoring extracts                                                                                                | Margarine                          |
| Oil-based salad dressing                                                                                          | Ready-to-eat frosting              |
| Progresso pizza sauce                                                                                             | Hunt's prima salsa spaghetti sauce |
| Buitoni marinara spaghetti sauce                                                                                  | Buitoni mushroom spaghetti sauce   |
| Ragu pizza sauce                                                                                                  | Old el Paso taco sauce             |
| La Victoria green taco sauce                                                                                      |                                    |
| Jello pudding and pie filling (lemon, vanilla, butterscotch)                                                      |                                    |
| Royal pudding and pie filling (lemon, vanilla, butterscotch and coffee flavors)                                   |                                    |
| Royal instant pudding and pie filling (lemon, vanilla, butterscotch and coffee flavors)                           |                                    |
| *If instructions call for 2 cups milk, substitute $\frac{3}{4}$ cup rich whip mixed with $\frac{3}{4}$ cup water. |                                    |
| <u>Only royal instant pudding is allowed.</u>                                                                     |                                    |

## ALLOWED BEVERAGES

|                                                                             |                              |
|-----------------------------------------------------------------------------|------------------------------|
| Tang (all flavors)                                                          | V-8 cocktail vegetable juice |
| HiC fruit punches and fruit drinks                                          | Kook-Aid (all flavors)       |
| Carbonated beverages (ex. Pepsi, Coke, Dr. Pepper, Gingerale, Sprite, etc.) |                              |

No beverages containing Aspartame are allowed.
